# Supplementary material
Source: publisher site journal article supplement (https://www.spandidos-publications.com/8186/downloadSupplementary)
Supplement: Supplementary file 1 [file downloadSupplementary]

Table SI. Association of cyclooxygenase-2 single-nucleotide polymorphisms with biochemical parameters in patients with type 2 diabetes mellitus.

| A, rs689466                                                                                                                                                                                           |          |                                         |                                    |                      |                     |                                 |                           |
|-------------------------------------------------------------------------------------------------------------------------------------------------------------------------------------------------------|----------|-----------------------------------------|------------------------------------|----------------------|---------------------|---------------------------------|---------------------------|
| Group                                                                                                                                                                                                 | CDM/UCDM | Cholesterol<br>(normal/borderline/high) | HDL<br>(normal/moderate/high risk) | LDL<br>(normal/high) | TG<br>(normal/high) | Creatinine<br>(low/normal/high) | Urea<br>(low/normal/high) |
| TT (n=83)                                                                                                                                                                                             | 41/42    | 59/14/10                                | 8/40/35                            | 77/6                 | 29/54               | 8/67/8                          | 1/73/9                    |
| TC (n=16)                                                                                                                                                                                             | 8/8      | 13/1/2                                  | 2/10/4                             | 15/1                 | 5/11                | 0/14/2                          | 0/13/3                    |
| CC (n=2)                                                                                                                                                                                              | 1/1      | 1/1/0                                   | 1/1/0                              | 2/0                  | 2/0                 | 0/2/0                           | 0/2/0                     |
| P-value                                                                                                                                                                                               | 1.000    | 0.5320                                  | 0.2266                             | 1.000                | 0.2287              | 0.7167                          | 0.6239                    |
| B, rs20417                                                                                                                                                                                            |          |                                         |                                    |                      |                     |                                 |                           |
| Group                                                                                                                                                                                                 | CDM/UCDM | Cholesterol<br>(normal/borderline/high) | HDL<br>(normal/moderate/high risk) | LDL<br>(normal/high) | TG<br>(normal/high) | Creatinine<br>(low/normal/high) | Urea<br>(low/normal/high) |
| GG (n=3)                                                                                                                                                                                              | 2/1      | 3/0/0                                   | 0/1/2                              | 3/0                  | 2/1                 | 0/3/0                           | 0/3/0                     |
| CG (n=30)                                                                                                                                                                                             | 12/18    | 23/5/2                                  | 2/19/9                             | 28/2                 | 12/18               | 3/25/2                          | 1/25/4                    |
| CC (n=68)                                                                                                                                                                                             | 36/32    | 47/11/10                                | 9/31/28                            | 63/5                 | 22/46               | 5/55/8                          | 0/60/8                    |
| P-value                                                                                                                                                                                               | 0.4510   | 0.7969                                  | 0.4693                             | 1.000                | 0.3714              | 0.8371                          | 0.5238                    |
| C, rs2066826                                                                                                                                                                                          |          |                                         |                                    |                      |                     |                                 |                           |
| Group                                                                                                                                                                                                 | CDM/UCDM | Cholesterol<br>(normal/borderline/high) | HDL<br>(normal/moderate/high risk) | LDL<br>(normal/high) | TG<br>(normal/high) | Creatinine<br>(low/normal/high) | Urea<br>(low/normal/high) |
| CC (n=74)                                                                                                                                                                                             | 39/35    | 52/11/11                                | 9/35/30                            | 68/6                 | 24/50               | 6/59/9                          | 0/65/9                    |
| CT (n=25)                                                                                                                                                                                             | 10/15    | 19/5/1                                  | 2/15/8                             | 24/1                 | 10/15               | 2/22/1                          | 1/21/3                    |
| TT (n=2)                                                                                                                                                                                              | 1/1      | 2/0/0                                   | 0/1/1                              | 2/0                  | 2/0                 | 0/2/0                           | 0/2/0                     |
| P-value                                                                                                                                                                                               | 0.6747   | 0.6067                                  | 0.8432                             | 0.7190               | 0.1574              | 0.7360                          | 0.4732                    |
| CDM, controlled diabetes mellitus where hemoglobin (Hb)A1c <7%; UCDM, uncontrolled diabetes mellitus where HbA1c ≥7%; TG, triglycerides, LDL, low-density lipoprotein; HDL, high-density lipoprotein. |          |                                         |                                    |                      |                     |                                 |                           |
